# Supplementary material for: Widespread intronic polyadenylation inactivates tumour suppressor genes in leukaemia
Source: Springer Nature journal article supplement (doi:10.1038/s41586-018-0465-8), 2018-08-24
Supplement: 41586_2018_465_MOESM1_ESM.pdf [file 41586_2018_465_MOESM1_ESM.pdf]

In the format provided by the authors and unedited.

# Widespread intronic polyadenylation inactivates tumour suppressor genes in leukaemia

Shih-Han Lee<sup>1,5</sup>, Irtisha Singh<sup>2,3,5</sup>, Sarah Tisdale<sup>1</sup>, Omar Abdel-Wahab<sup>4</sup>, Christina S. Leslie<sup>2</sup> & Christine Mayr<sup>1\*</sup>

---

<sup>1</sup>Cancer Biology and Genetics Program, Memorial Sloan Kettering Cancer Center, New York, NY, USA. <sup>2</sup>Computational and Systems Biology Program, Memorial Sloan Kettering Cancer Center, New York, NY, USA. <sup>3</sup>Tri-I Program in Computational Biology and Medicine, Weill Cornell Graduate College, New York, NY, USA. <sup>4</sup>Human Oncology and Pathogenesis Program, Memorial Sloan Kettering Cancer Center, New York, NY, USA. <sup>5</sup>These authors contributed equally: Shih-Han Lee, Irtisha Singh. \*e-mail: [mayrc@mskcc.org](mailto:mayrc@mskcc.org)

Figure 2a

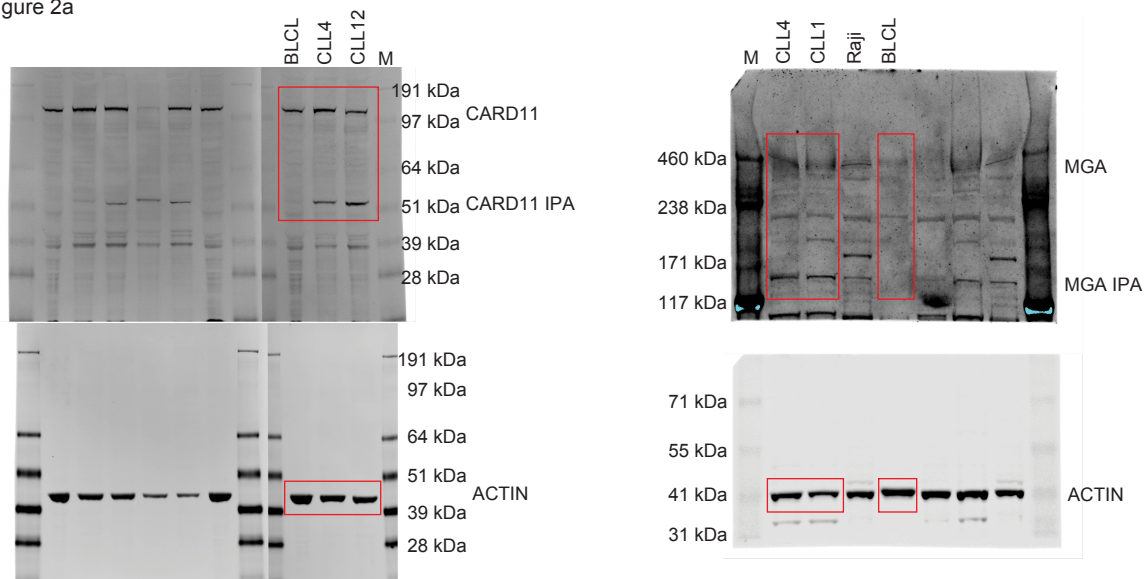

Figure 2d

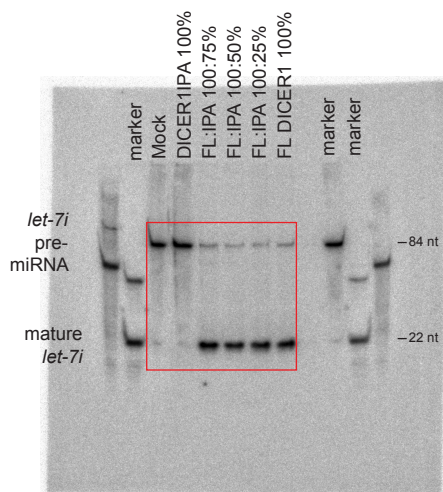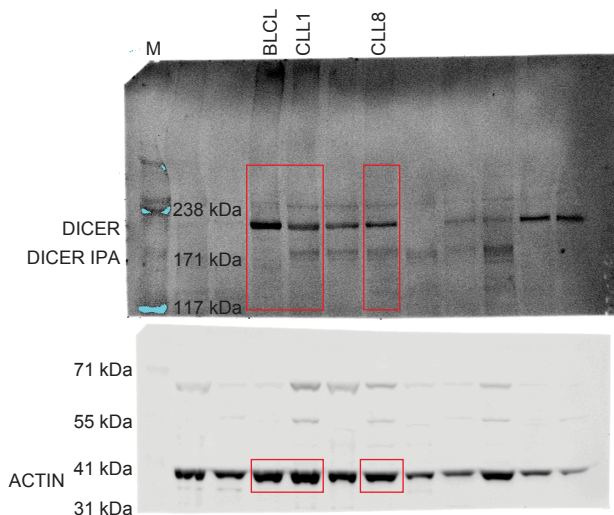

For all Western blot gels, the loading control (ACTIN) is from the same gel as the experimental one

Figure 2e

Individual P values obtained from two-sided t-test for independent samples of values shown in Fig. 2e.

|         | MGA IPA vs GFP | MGA FL vs GFP | Equal variance |
|---------|----------------|---------------|----------------|
| MYC     | 0.88           | 0.33          | yes            |
| TP53    | 0.70           | 0.07          | yes            |
| BLK     | 1E-4           | 6E-5          | yes            |
| ATF4    | 4E-8           | 0.003         | yes            |
| CDKN1B  | 1E-4           | 2E-5          | yes            |
| NME1    | 0.25           | 0.003         | yes            |
| HNRNPA1 | 0.21           | 8E-5          | yes            |
| MCM5    | 0.03           | 0.02          | yes            |
| CDC25A  | 0.03           | 9E-6          | yes            |
| BAX     | 0.04           | 0.02          | yes            |
| CDK4    | 0.003          | 0.01          | yes            |
| MCM4    | 0.008          | 9E-6          | yes            |

Figure 3b

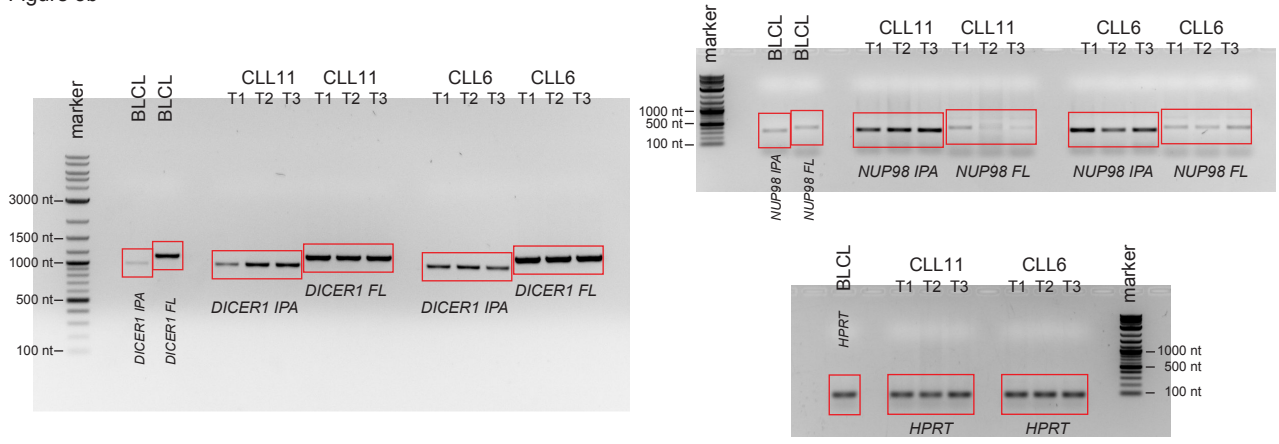

Figure 4f

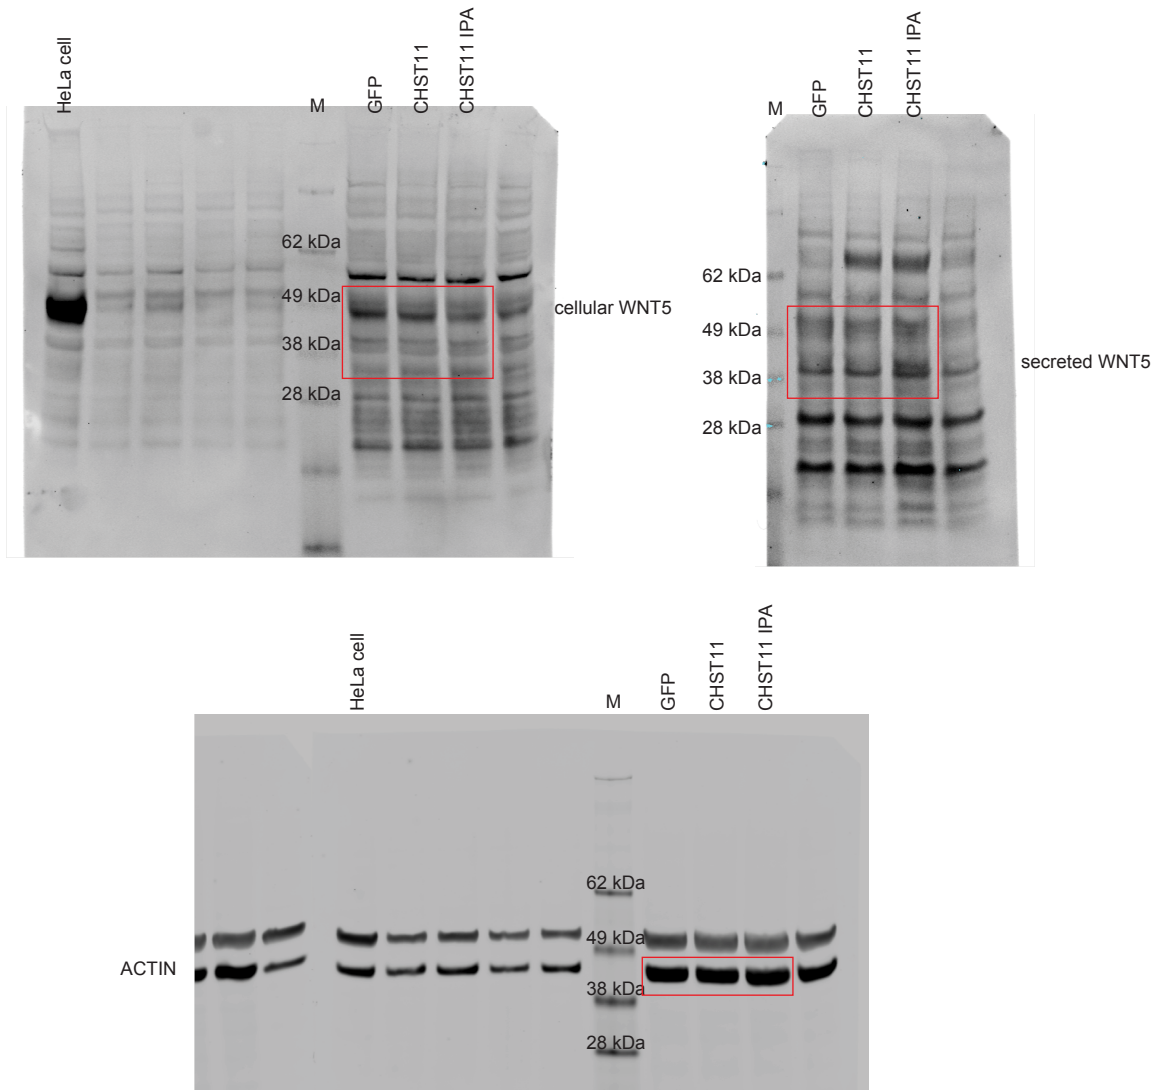

For all Western blot gels, the loading control (ACTIN) is from the same gel as the experimental one.

Extended Data Figure 4

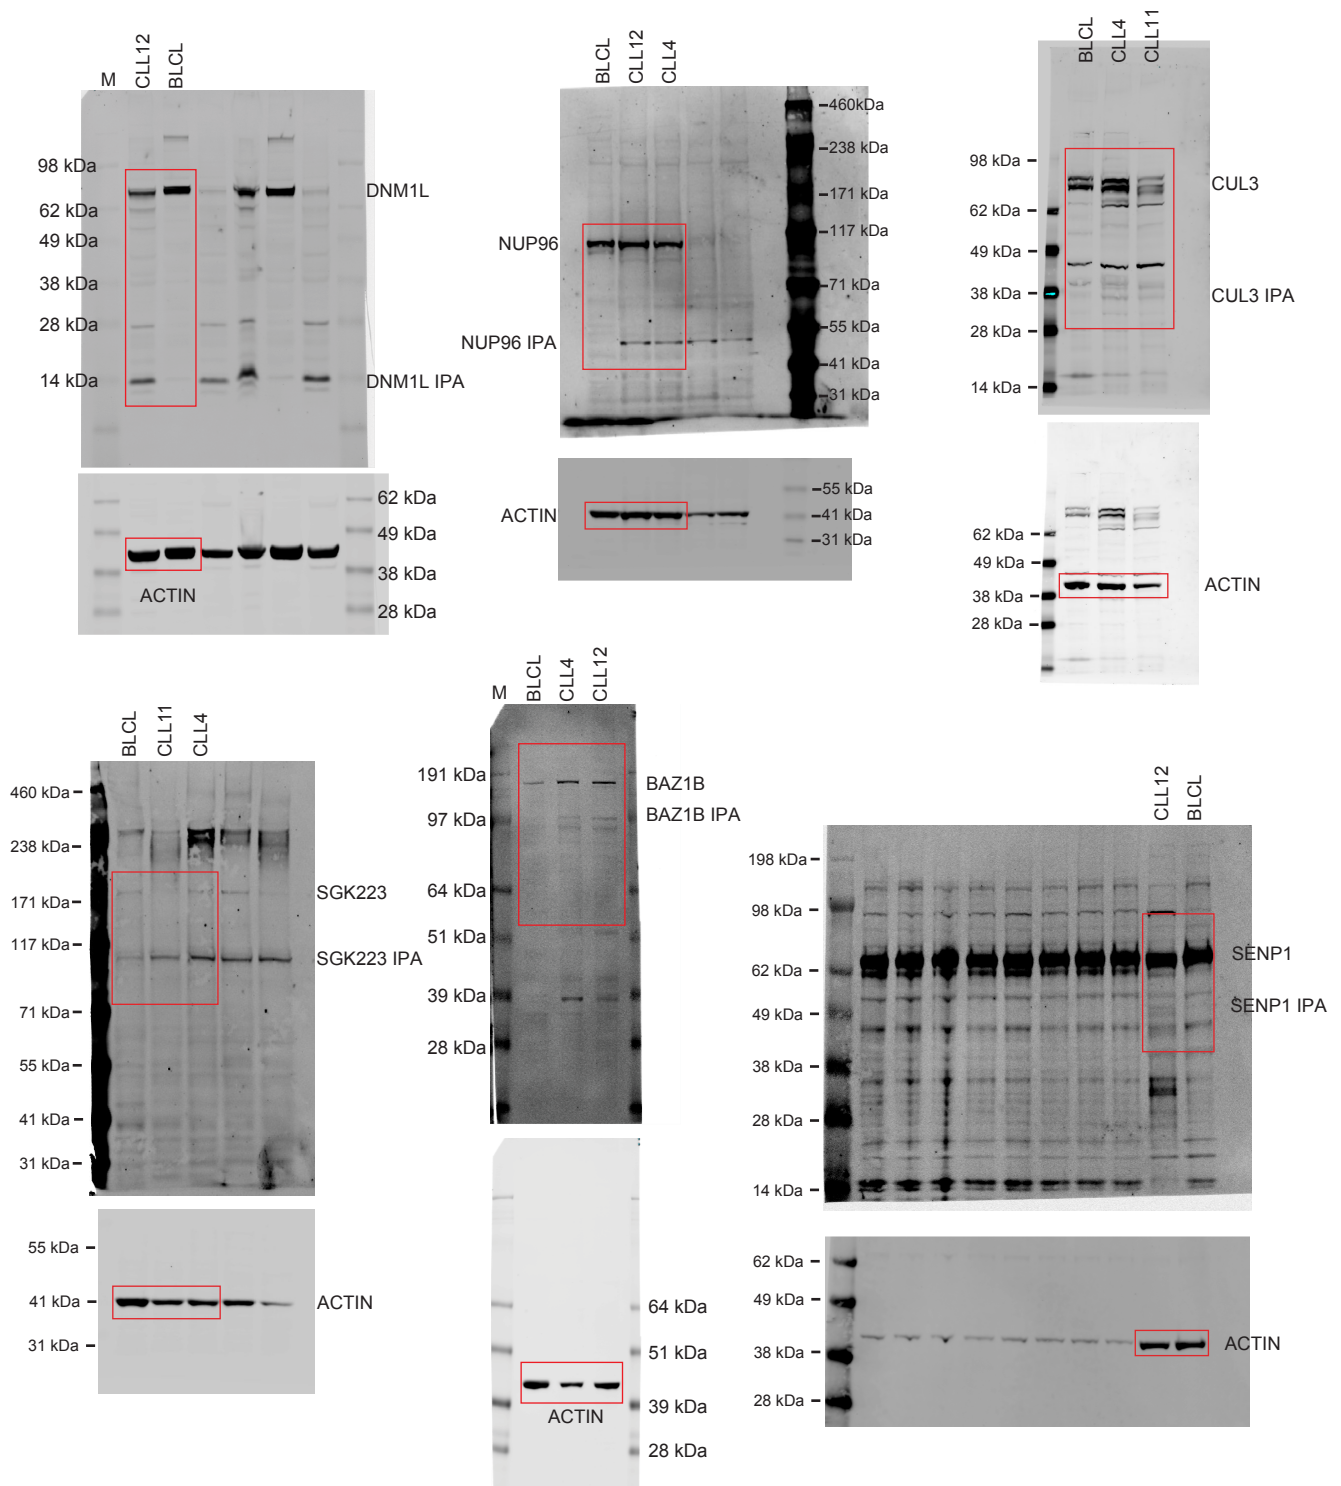

For all Western blot gels, the loading control (ACTIN) is from the same gel as the experimental one.

Extended Data Figure 4

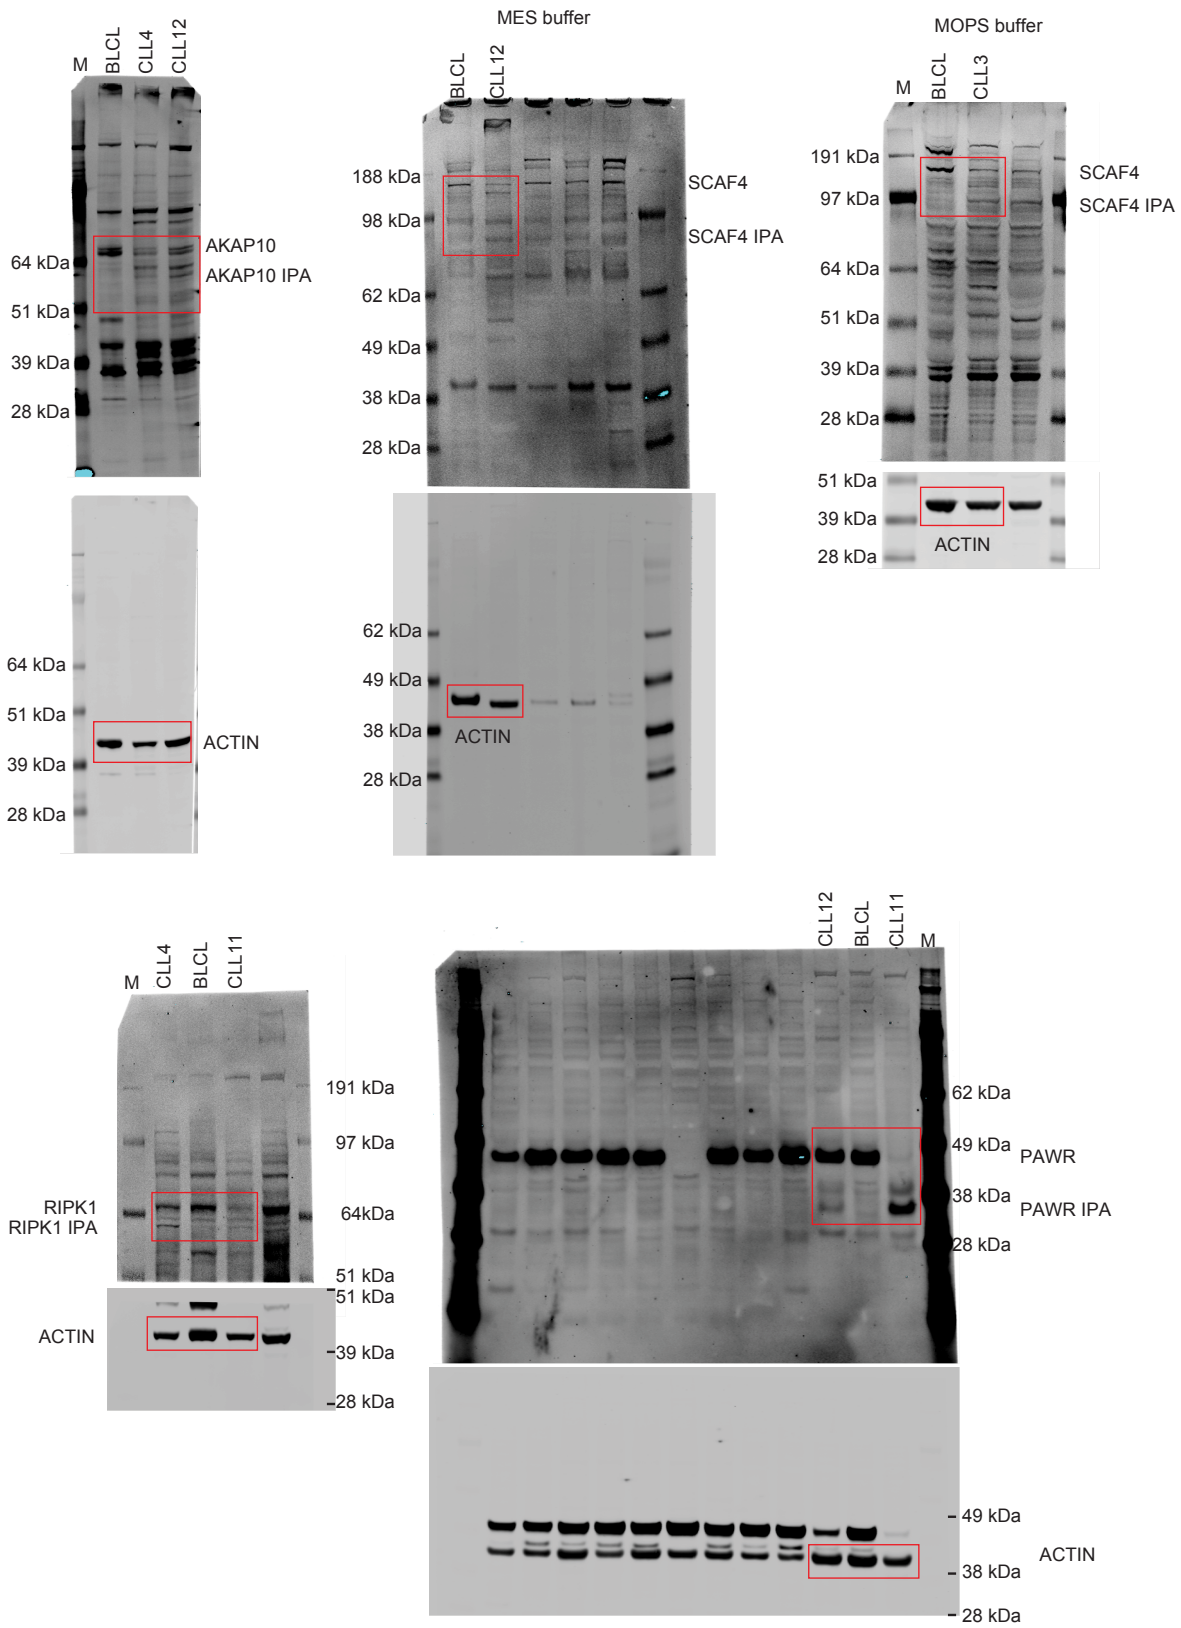

For all Western blot gels, the loading control (ACTIN) is from the same gel as the experimental one.

Extended Data 5a

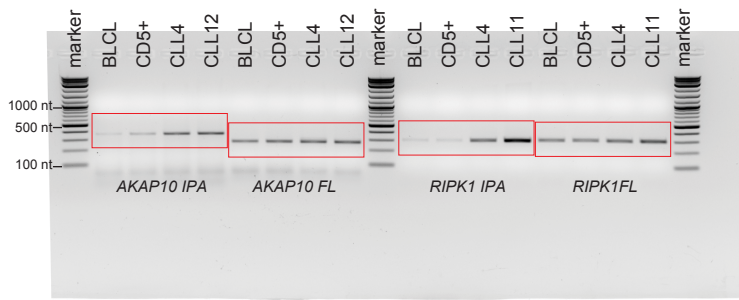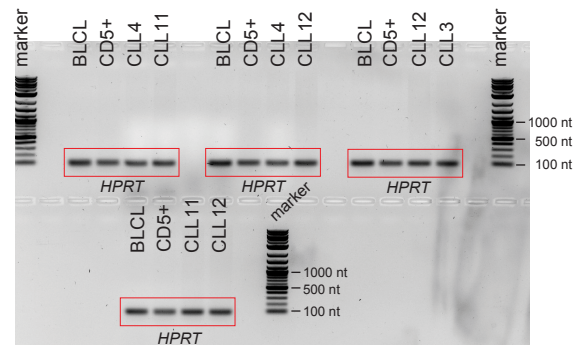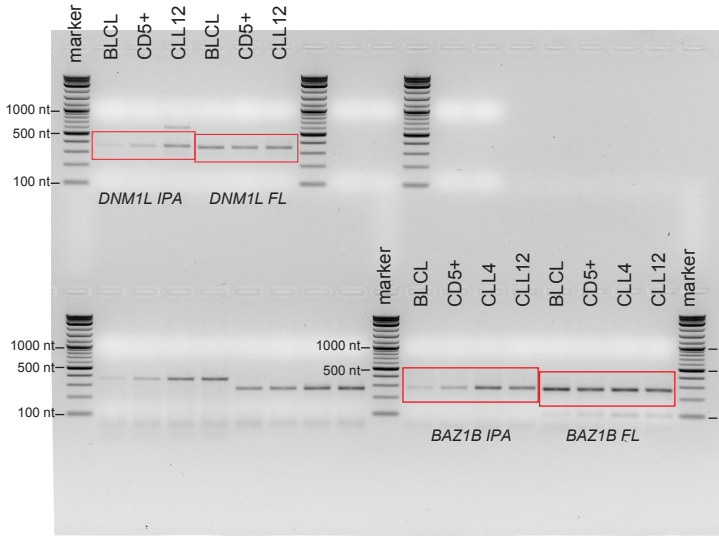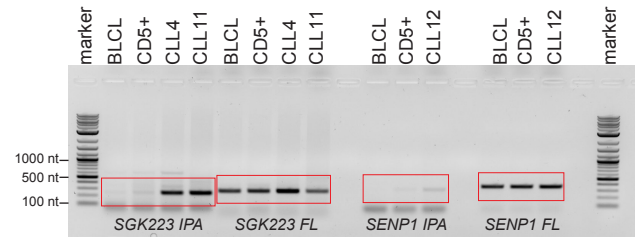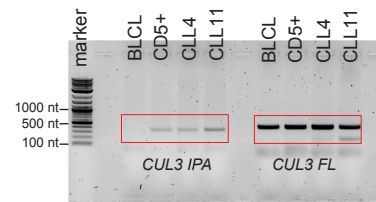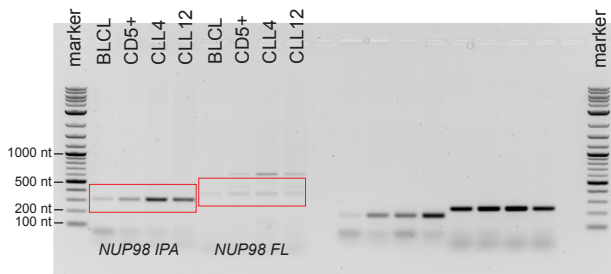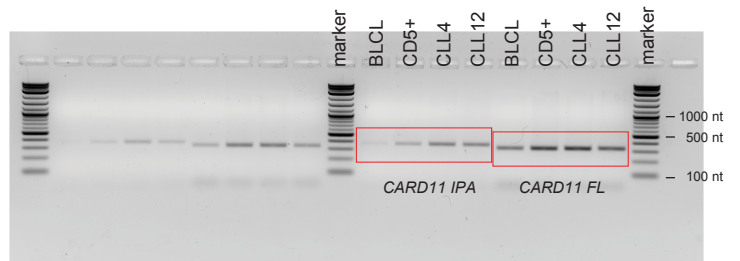

Extended Data 5a

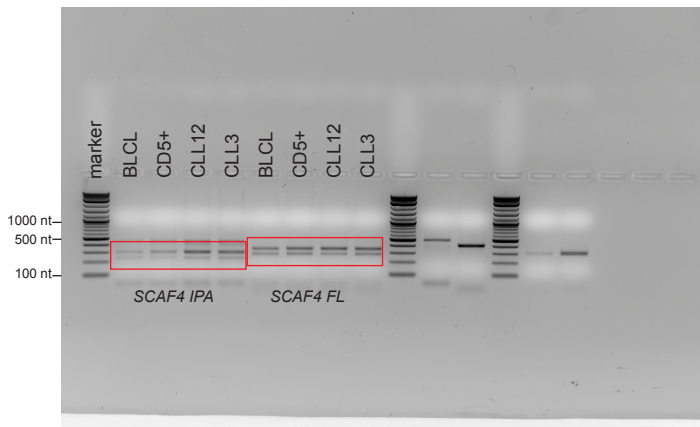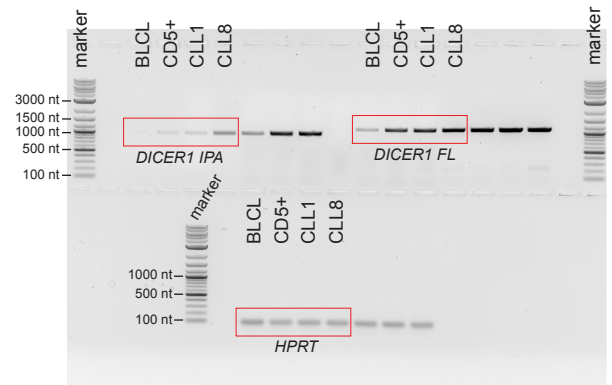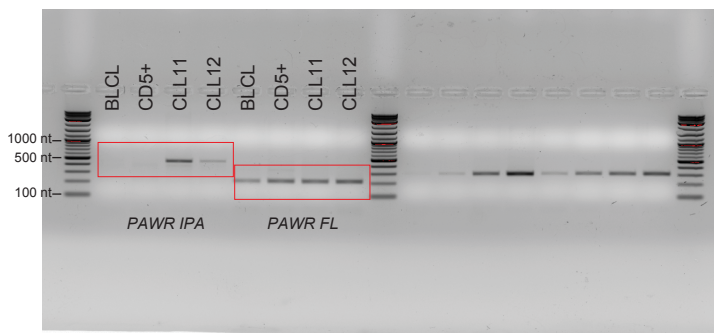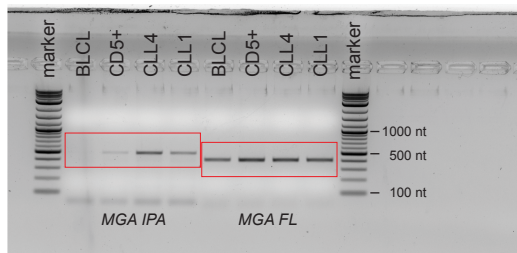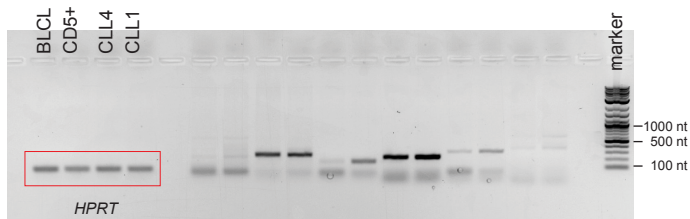

Extended Data Figure 5b

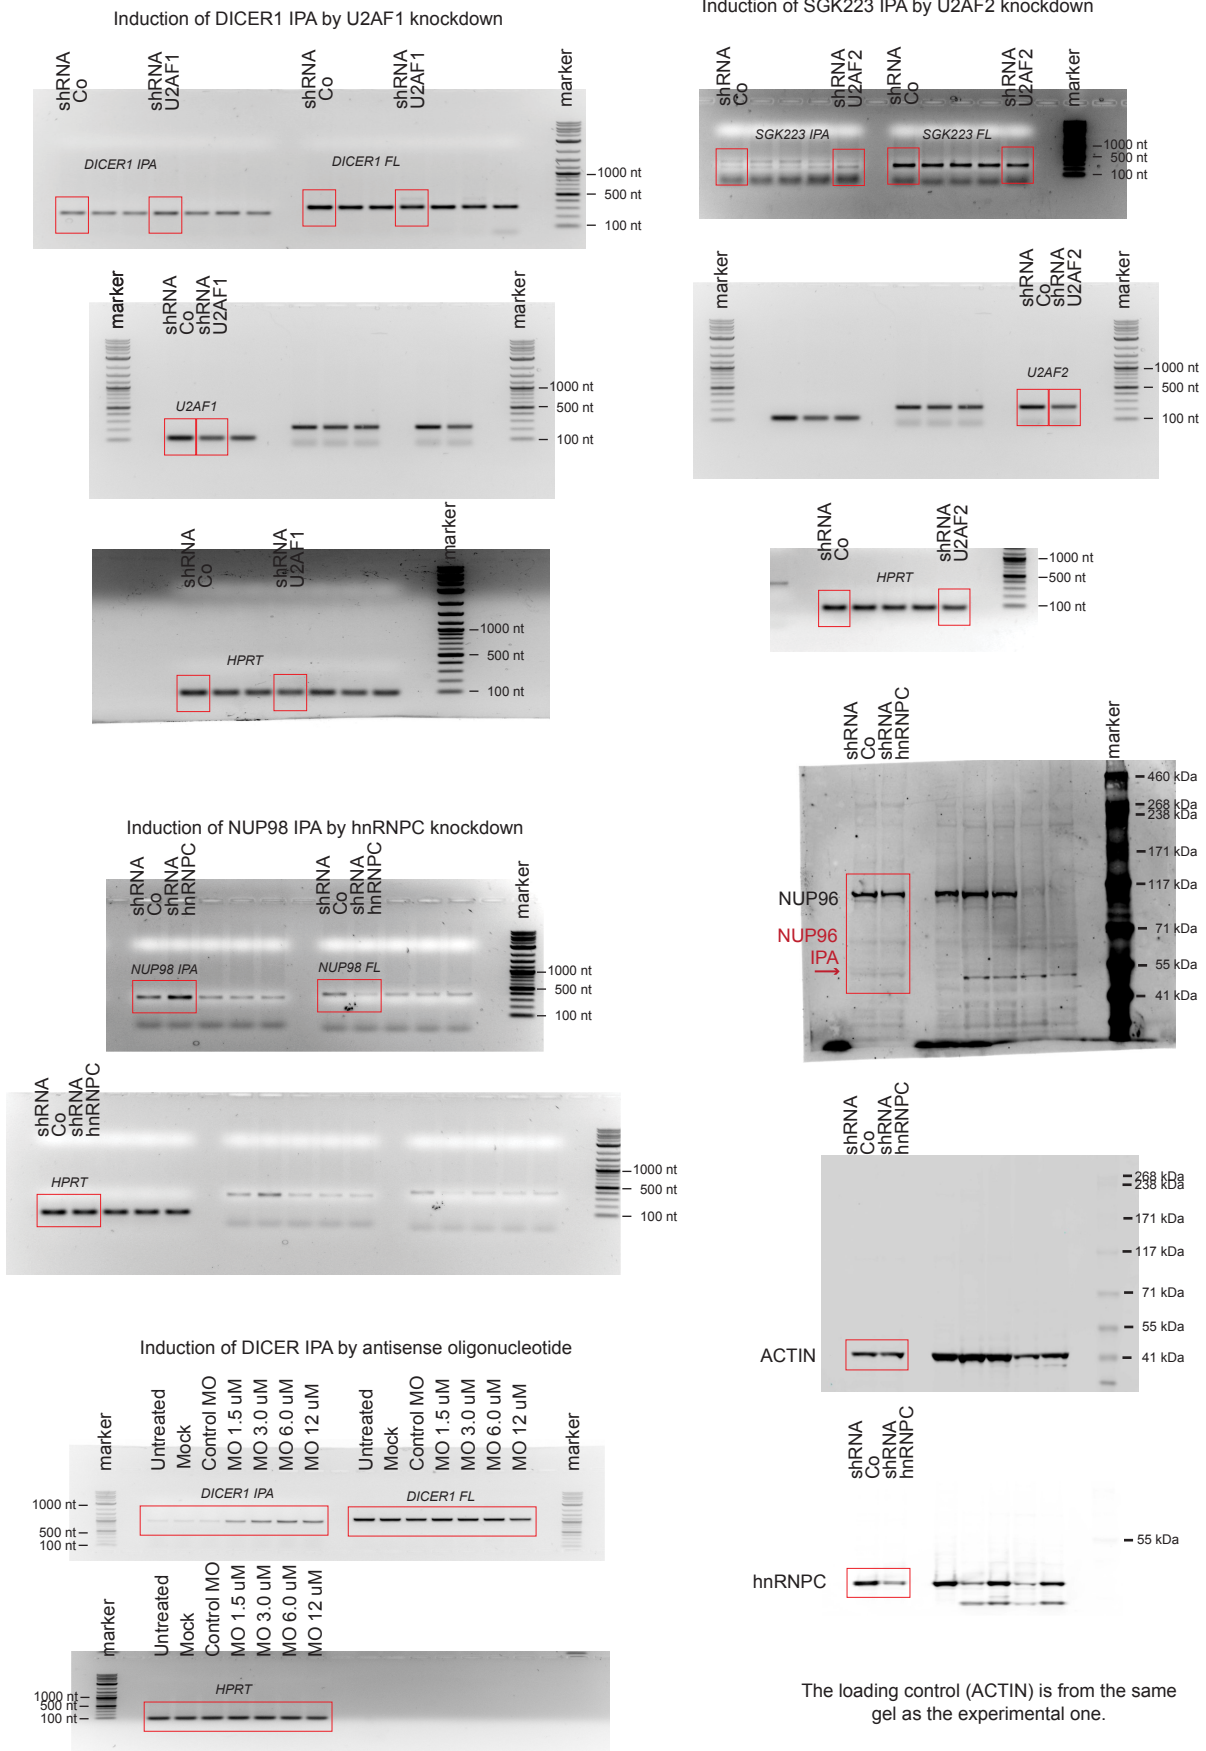



Extended Data Figure 5b

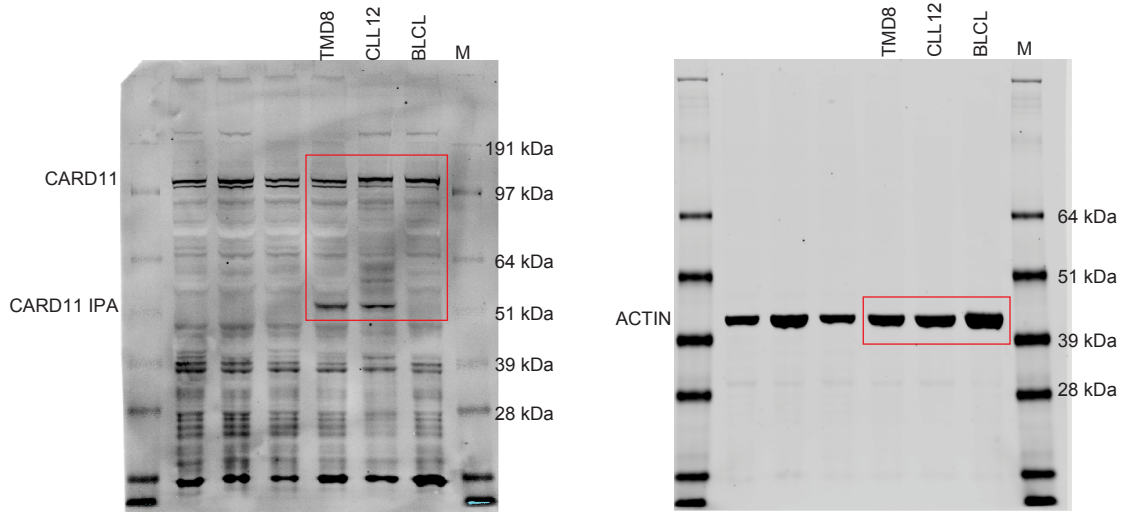

Extended Data Figure 5c

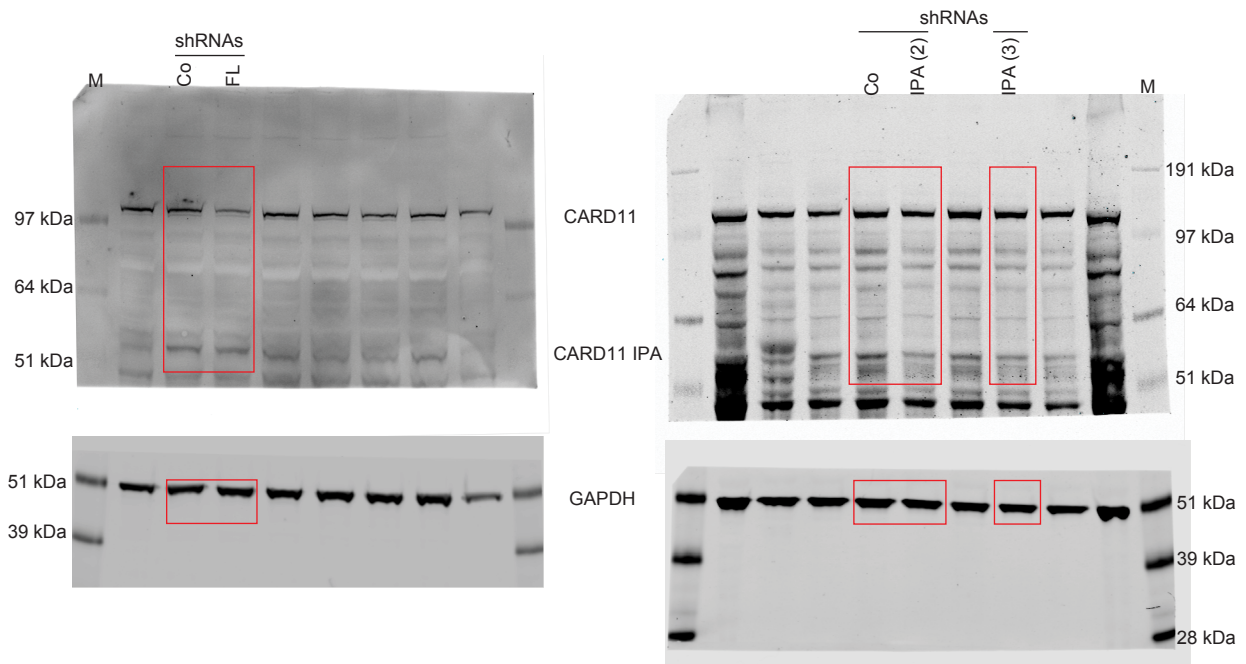

For all Western blot gels, the loading control (ACTIN/GAPDH) is from the same gel as the experimental one.

Extended Data Figure 5c

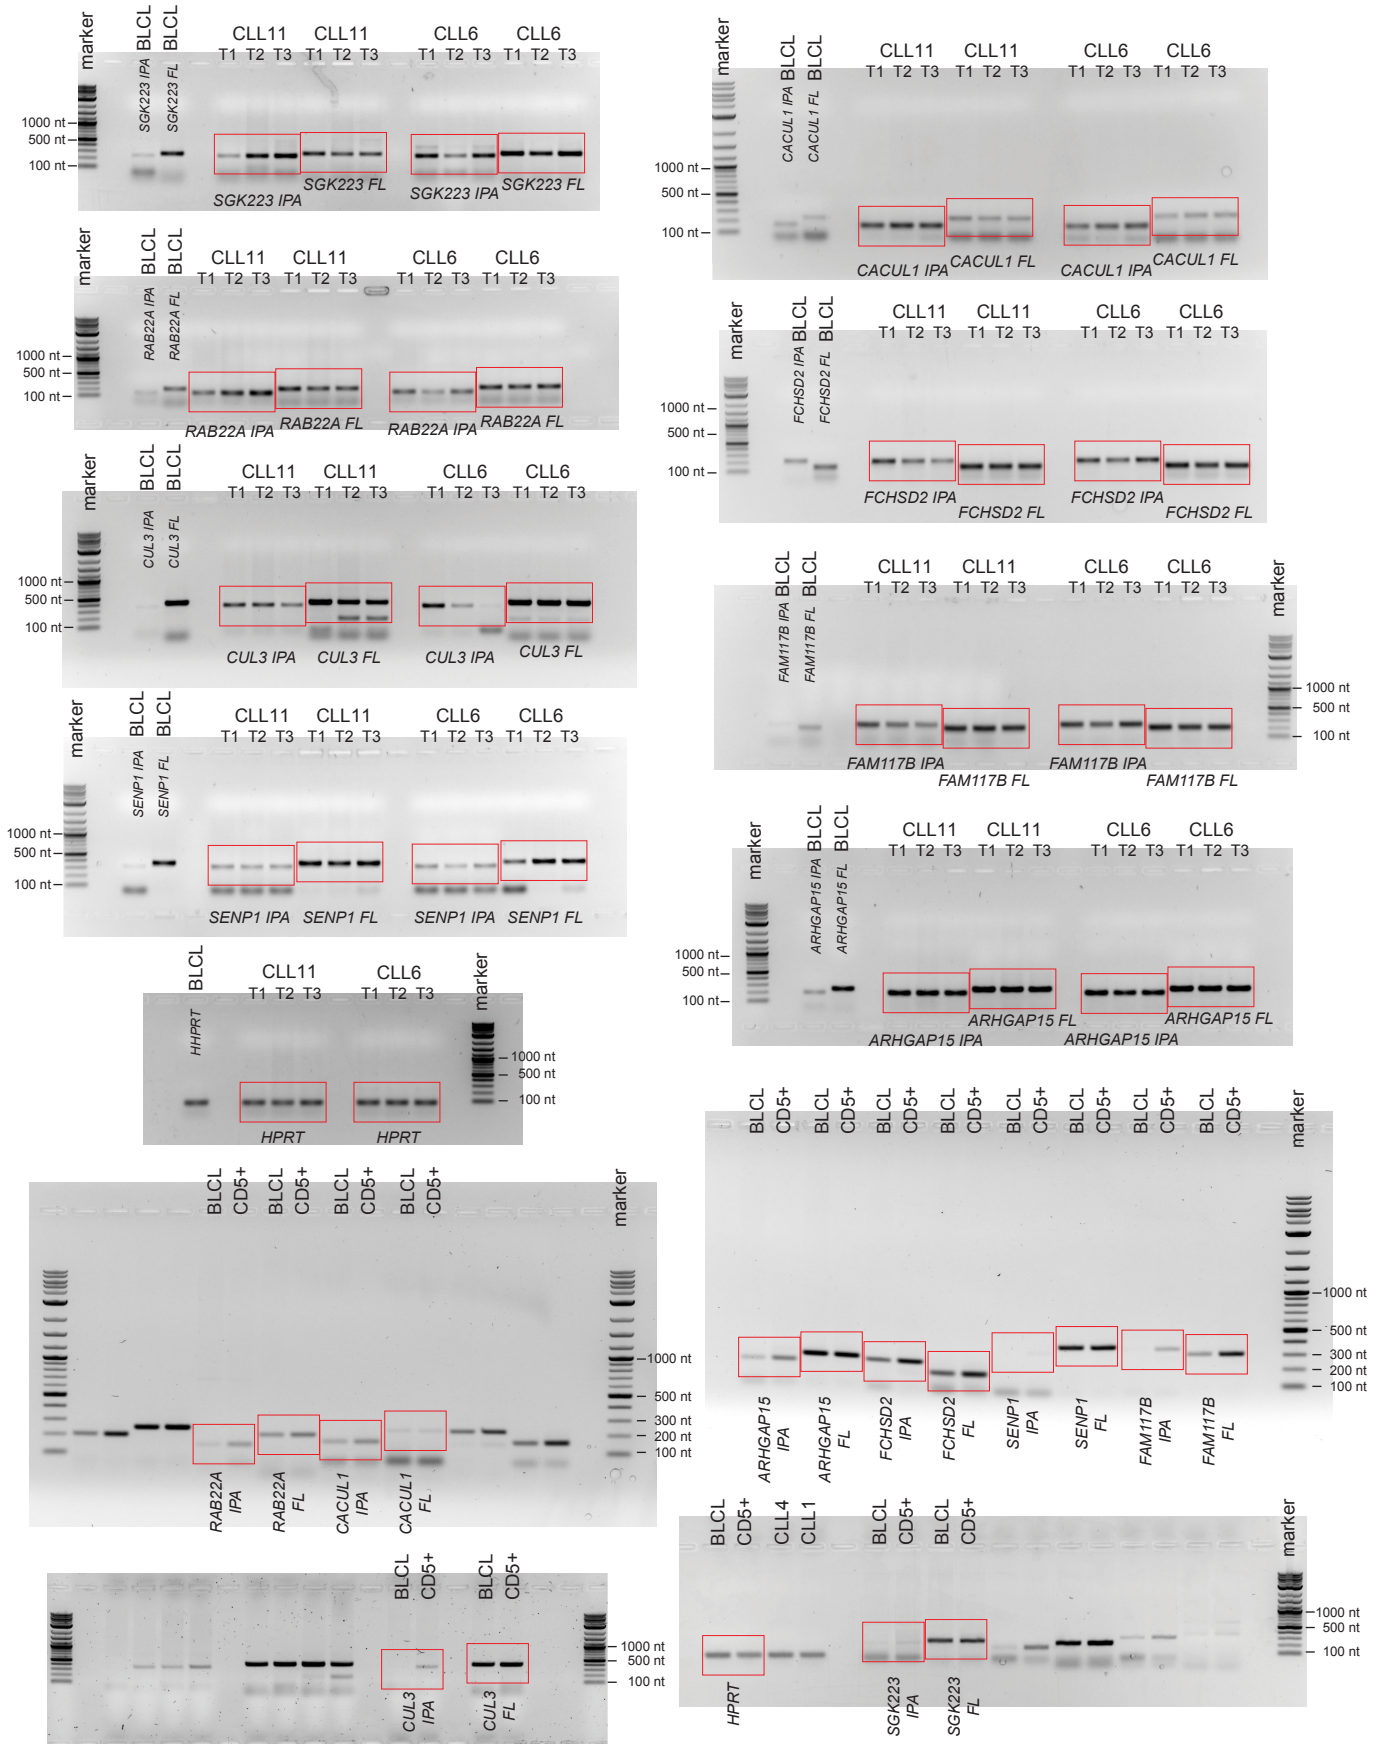

Extended Data Figure 5d

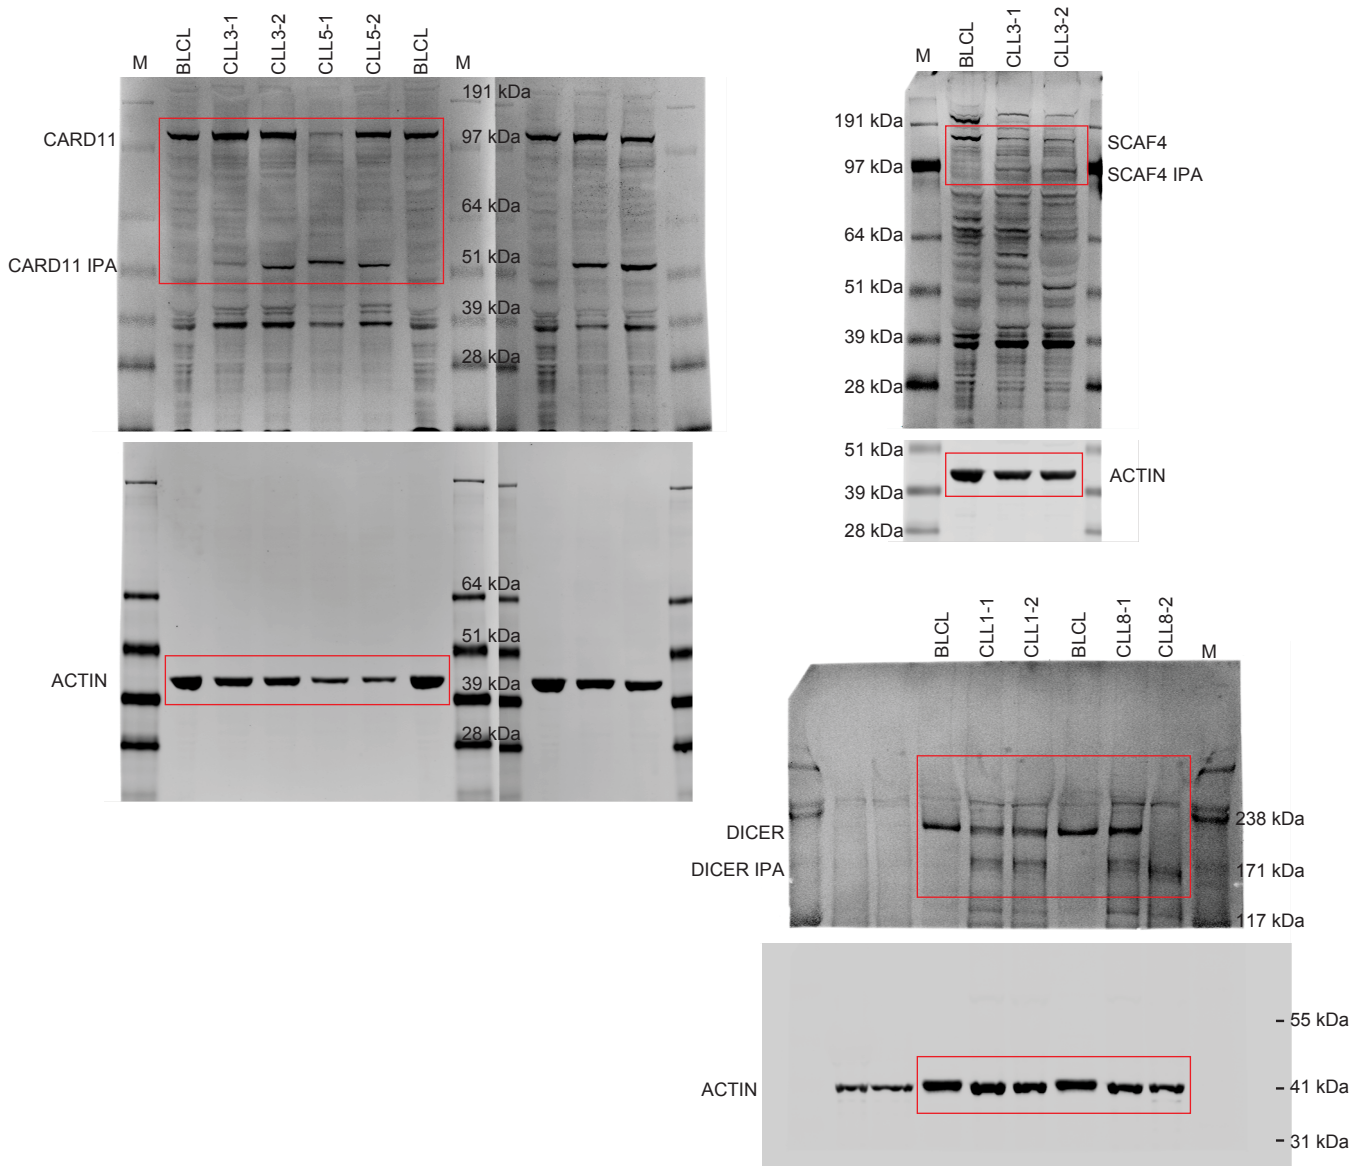

For all gels, the loading control (ACTIN) is from the same gel as the experimental one above it.

Extended Data Figure 6e

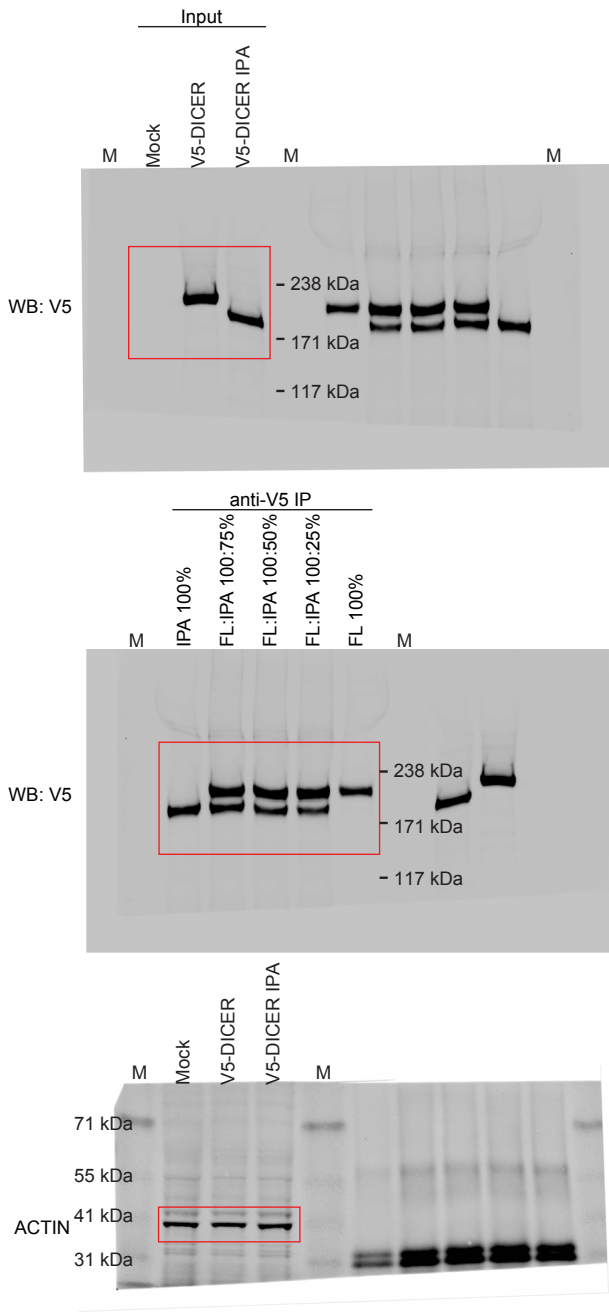

For all Western blot gels, the loading control (ACTIN) is from the same gel as the experimental one.

Extended Data Figure 6f

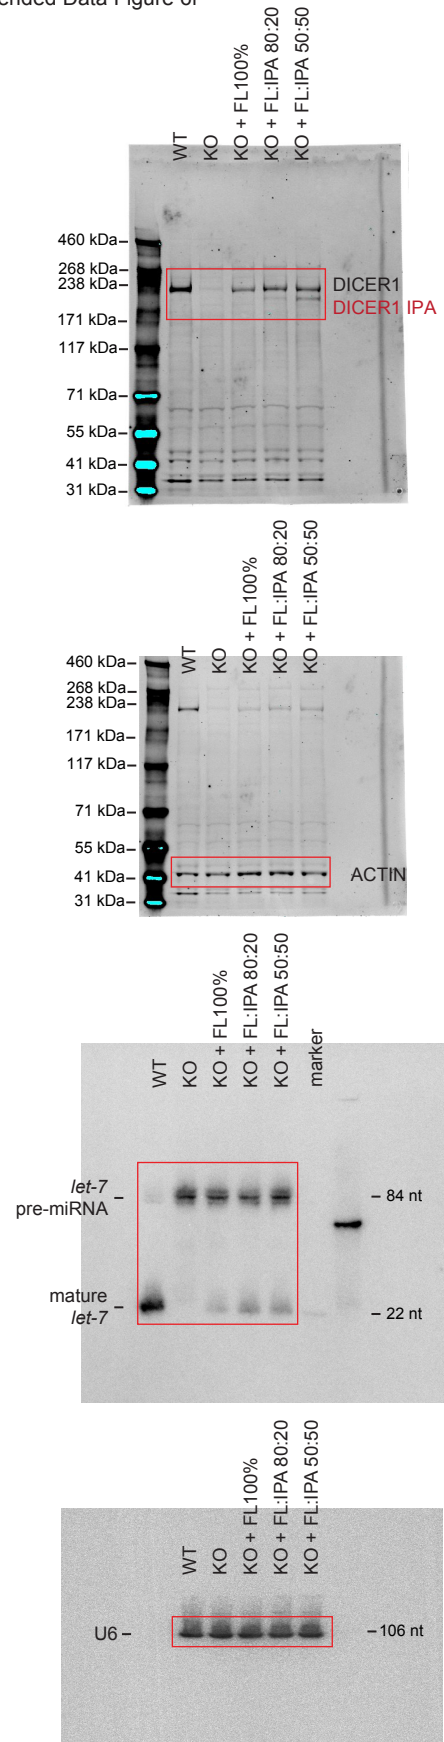

Extended Data Figure 6g

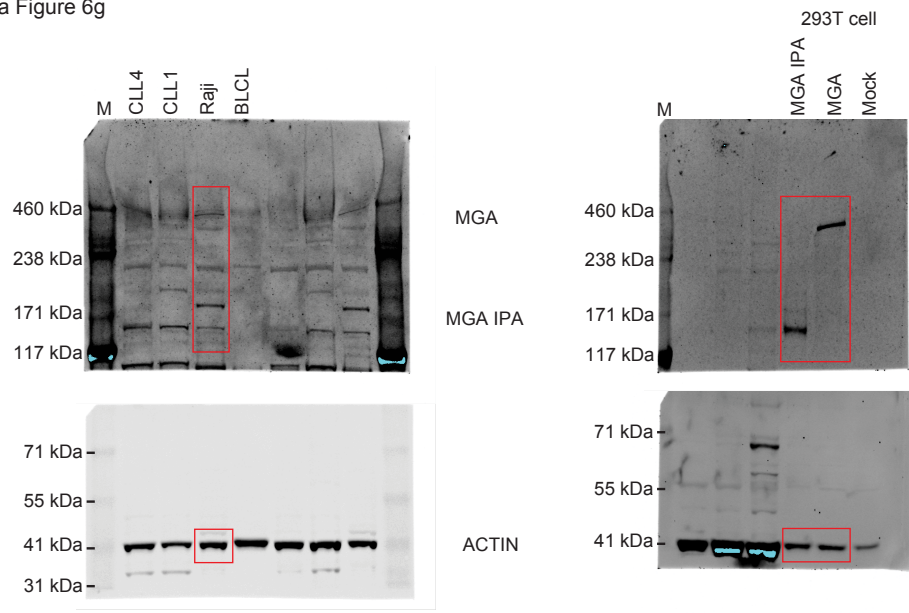

For all Western blot gels, the loading control (ACTIN) is from the same gel as the experimental one.

Extended Data Figure 8f

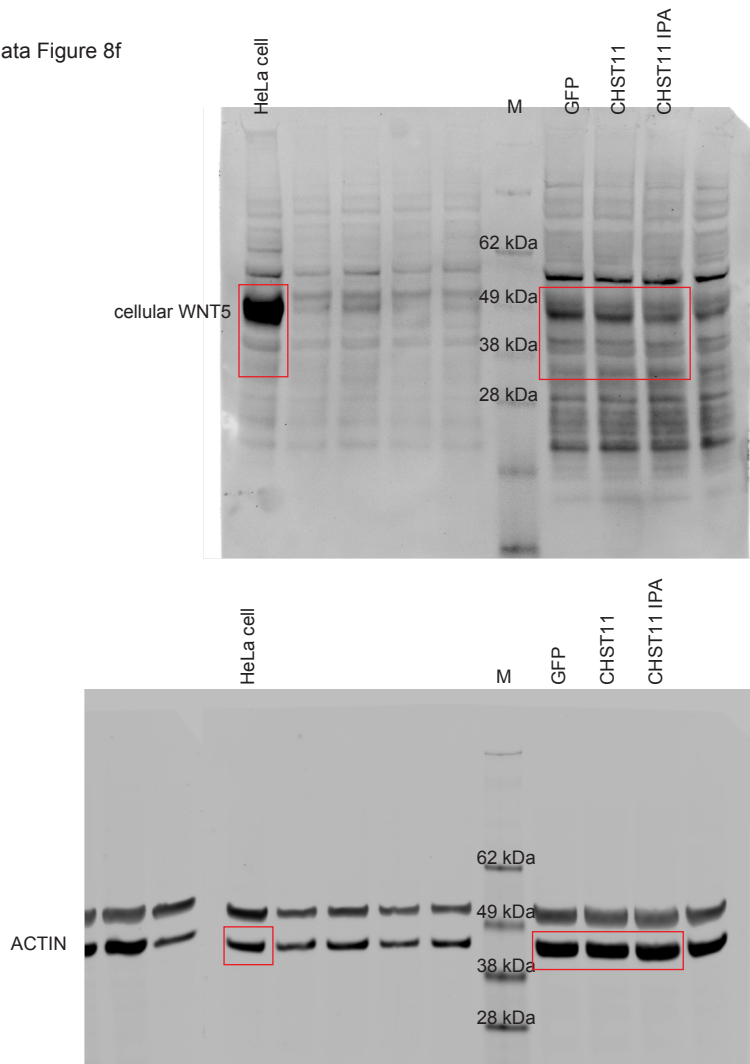

For all Western blot gels, the loading control (ACTIN) is from the same gel as the experimental one.
